# Supplementary material for: Visual and efficient immunosensor technique for advancing biomedical applications of quantum dots on Salmonella detection and isolation
Source: Royal Society of Chemistry journal article supplement (doi:10.1039/c5nr07424j), 2016-01-01
Supplement: c5nr07424j1.pdf [file c5nr07424j1.pdf]

1

## Supporting Information for

2 **Visual and efficient immunosensor technique for advancing**

3 **biomedical applications of quantum dots on *Salmonella***

4 **detection and isolation**

5 *Feng Tang<sup>a,b</sup>, Dai-Wen Pang<sup>c</sup>, Zhi Chen<sup>d</sup>, Jian-Bo Shao<sup>e</sup>, Ling-Hong Xiong<sup>c,f</sup>, Yan-Ping Xiang<sup>g</sup>,*  
6 *Yan Xiong<sup>d</sup>, Kai Wu<sup>h</sup>, Hong-Wu Ai<sup>b</sup>, Hui Zhang<sup>i</sup>, Xiao-Li Zheng<sup>e</sup>, Jing-Rui Lv<sup>e</sup>, Wei-Yong Liu<sup>a</sup>,*  
7 *Hong-Bing Hu<sup>e</sup>, Hong Mei<sup>e</sup>, Zhen Zhang<sup>b</sup>, Hong Sun<sup>b</sup>, Yun Xiang<sup>b,\*</sup>, Zi-Yong Sun<sup>a,\*</sup>*

8 <sup>a</sup>Department of Laboratory Medicine, Tongji Hospital, Tongji Medical College, Huazhong  
9 University of Science and Technology, Wuhan 430030, People's Republic of China.

10 <sup>b</sup>Department of Laboratory Medicine, Wuhan Children's Hospital, Huazhong University of  
11 Science and Technology, Wuhan 430016, People's Republic of China.

12 <sup>c</sup>Key Laboratory of Analytical Chemistry for Biology and Medicine (Ministry of Education),  
13 College of Chemistry and Molecular Science, State Key Laboratory of Virology, and Wuhan  
14 Institute of Biotechnology, Wuhan University, Wuhan 430072, People's Republic of China.

15 <sup>d</sup>Microbiological Laboratory, Wuhan Center for Disease Control and Prevention, Wuhan  
16 430015, People's Republic of China.

17 <sup>e</sup>Wuhan Children's Hospital, Huazhong University of Science and Technology, Wuhan 430016,  
18 People's Republic of China.

1 <sup>f</sup>Shenzhen Center for Disease Control and Prevention, Shenzhen 518055, People's Republic of  
2 China.

3 <sup>g</sup>Department of Rehabilitation, Tongji Hospital, Tongji Medical College, Huazhong University  
4 of Science and Technology, Wuhan 430030, People's Republic of China.

5 <sup>h</sup>Jiangan Center for Disease Control and Prevention, Wuhan 430017, People's Republic of China.

6 <sup>i</sup>Microbiological laboratory, Qiaokou Center for Disease Control and Prevention, Wuhan  
7 430030, People's Republic of China.

8

9 \* Corresponding authors: Zi-Yong Sun: zysun@tjh.tjmu.edu.cn; 0086-027-83663639;

10 Yun Xiang: xiangyun5272008@163.com; 0086-027-82433426

11

12

13

14

15

16

17

18

19

20

21

# 1 **Supplementary Text**

## 2 **Supplementary Note 1**

### 3 **Reagents and instruments.**

4 Mouse monoclonal antibodies (Product number: B343M) to *Salmonella* (1 mg/mL) were  
5 purchased from Abcam (London). *CdSe/ZnS* QDs (Product number: Q4525) was purchased from  
6 Wuhan Jiayuan Quantum Dots Co., Ltd., China. Xylose lysine desoxycholate agar (XLD,  
7 Product number: R459902), Rappaport–Vassiliadis agar (RV, Product number: CM1112B),  
8 Tryptone Soy Agar (TSA, Product number: CM0277B) and buffered peptone water (BPW,  
9 Product number: CM1049B) were purchased from Oxoid (London). Succinimidyl-4-(*N*-  
10 maleimidomethyl) cyclohexane-1- carboxylate (SMCC, CAS Number: 64987-85-5, Product  
11 Number: S0853) was purchased from TCI Europe (Shanghai, China). Dithiothreitol (DTT,  
12 Product Number: 20290) and 50X TAE Buffer (Tris-acetate-EDTA) were purchased from  
13 Thermo Fisher Scientific Inc (USA). Super-speed Super Absorbing Polymer (SSAP, Product  
14 number: 127284) was purchased from Liaocheng City Yongxing Environmental Protection  
15 Material Co., Ltd. China. All chemicals were of analytical grade and all aqueous solutions were  
16 prepared with double-distilled water.

17 Swabs were customized from the Hubei Qianjiang Kingphar medical material Co. Ltd.,  
18 China. All serial dilutions of bacteria were prepared using a turbidity meter (DensiCHEK Plus,  
19 bioMerieux). The biochemical identification of the pathogen in samples was performed using an  
20 automatic microbiology analyzer (VITEK 2 COMPACT, Biomerieux, France).

1 The artificial excitation light source based on a blue light-emitting diode (LED) and a  
2 matched optical cut-off filter (Standard serial number: ZWB2) were customized from Beijing  
3 YongXing Information Sensing Technology Co., Ltd. China. The stereomicroscope (14× -90×,  
4 trinocular continuous zoom microscope, SZM-45T1) was ordered from the Ningbo Sunny  
5 Instruments Co., Ltd. China. Images of fluorescence emission and absorption spectra were  
6 recorded on a UV–visible spectrophotometer (UV-2550, Shimadzu, Japan) and a fluorescence  
7 spectrophotometer (LS-55, Shimadzu, Japan).

8 Laser scanning confocal microscope (LSCM), transmission electron microscopy (TEM) and  
9 field emission scanning electron microscope (FESEM) analyses were conducted on an Olympus  
10 FuoView™ FV1000 system, a Hitachi 7000FA system and a Hitachi S-4800 system,  
11 respectively.

12  
13  
14  
15  
16  
17  
18  
19  
20  
21  
22  
23  
24  
25

1

## 2 **Supplementary Note 2**

### 3 **Preparation of bacterial strains.**

4 Bacterial strains were purchased from American Type Culture Collection (ATCC), the National  
5 Center for Medical Culture Collections (CMCC, Beijing, China) and the Collection Center of  
6 Agricultural Microbiology (CCAM, Hubei, China).

7 A total of 12 type strains were prepared, including *Salmonella Paratyphoid A* (CMCC  
8 50093), *Salmonella Typhimurium* (ATCC 14028), *Salmonella Infantis* (ATCC 51741),  
9 *Salmonella manhattan* (CMCC 50152), *Salmonella Enteritidis* (ATCC 13076), *Salmonella*  
10 *senftenberg* (CMCC 50105), *Salmonella Aberdeen* (CMCC 50147), *Salmonella typhi* (ATCC  
11 19430), *Salmonella muenster* (CCAM 090010), *Escherichia coli* (ATCC 25922), *Proteus*  
12 *mirabilis* (ATCC 12453) and *Citrobacter freundii* (ATCC 10787). Forty local *Salmonella*  
13 belonging to different serotypes were collected and identified by the Center for Disease Control  
14 and Prevention (CDC) in Wuhan, Hubei, China.

15

16

17

18

19

20

21

22

23

1

2 **Supplementary Note 3**

3 **Table S1**

4 **Technical Data of optical cut-off filter (ZWB2)**

| <b>Test Items</b>       | <b>Type/Unit</b>  | <b>Parameters of Ultraviolet Glass</b> |
|-------------------------|-------------------|----------------------------------------|
| Thickness               | mm                | 1                                      |
| A(2856k)                | x                 | 0.532                                  |
|                         | y                 | 0.171                                  |
|                         | Y                 | 0.900                                  |
| D65(6504k)              | x                 | 0.231                                  |
|                         | y                 | 0.032                                  |
|                         | Y                 | 0.400                                  |
| ND                      |                   | 1.520                                  |
| $\alpha \times 10^{-7}$ | °C                | 97                                     |
| Tg                      | °C                | 515                                    |
| Ts                      | °C                | 589                                    |
| S                       | g/cm <sup>3</sup> | 2.65                                   |
| DA                      | grade             | 2                                      |
| DW                      | grade             | 2                                      |
| Transmittance(313nm)    | %                 | ≥ 38.0                                 |
| Transmittance(365nm)    | %                 | ≥ 80.0                                 |
| Transmittance(405nm)    | %                 | ≤ 8.0                                  |
| Transmittance(700nm)    | %                 | ≤ 14.0                                 |
| Bubble                  | grade             | C                                      |
| Stripe                  | grade             | 4                                      |

|        |                     |   |
|--------|---------------------|---|
| Stress | $10^{12}/\text{Pa}$ | 3 |
|--------|---------------------|---|

1 A(2856k) and D65(6504k) are the chromaticity values; ND, Index of refraction;  $\alpha \times 10^{-7}$ ,  
2 Coefficient of thermal expansion; Tg, Transition temperature; Ts, Softening temperature; S,  
3 Proportion; DA, Acid resistance; DW, Water resistance; The relative parameters and units are in  
4 accordance with the standard of International Commission on Illumination (CIE).

5

6

7

8

9

10

11

12

13

14

15

16

17

18

19

20

21

22

23

24

25

26

27

1

2 **Supplementary Note 4**

3 **Table S2**

4 **SSAP (127284) Technical Data**

| Test Items                                          | Type/Unit | Parameters   |
|-----------------------------------------------------|-----------|--------------|
| Appearance                                          |           | White powder |
| Free Absorbency For Distilled Water                 | g/g       | $\geq 500$   |
| Free Absorbency (0.9 % salty water)                 | g/g       | $\geq 50$    |
| Retention Capacity                                  | g/g       | $\geq 40$    |
| Absorbing Capacity Under Load (0.3 PSI)             | g/g       | $\geq 30$    |
| Absorbing Rate (g/g/sec) (25 Times Salty Water)     | seconds   | $\leq 40$    |
| Moisture Content                                    | %         | $\leq 7$     |
| PH Value                                            |           | 6.5~7.5      |
| $\leq 20$ Mesh (On 830 $\mu\text{m}$ )              | %         | 0            |
| 20~40 Mesh (830 $\mu\text{m}$ -380 $\mu\text{m}$ )  | %         | 30 $\pm$ 5   |
| 20~60 Mesh (830 $\mu\text{m}$ -250 $\mu\text{m}$ )  | %         | $\geq 70$    |
| 60~80 Mesh (250 $\mu\text{m}$ -180 $\mu\text{m}$ )  | %         | $\leq 20$    |
| 80~100 Mesh (180 $\mu\text{m}$ -150 $\mu\text{m}$ ) | %         | $\leq 5$     |
| $\geq 100$ Mesh (Under 150 $\mu\text{m}$ )          | %         | 1            |

5

PSI, Pounds per square inch; Mesh, Unit of granule diameter.

6

7

8

9

10

11



1

## 2 **Supplementary Note 5**

### 3 **Characterization of mAbs-conjugated QDs bioprobes.**

4 As shown in **Figure S1A**, the mAbs-conjugated QDs run slower than the QDs. Under optimal  
5 conditions, the concentration of mAbs-conjugated QDs was  $98.6 \times 10^{-2} \mu\text{g}/\mu\text{L}$ . The technique  
6 using antibody- conjugated QDs has been designed to increase analytic sensitivity of the  
7 detection method.<sup>1,2</sup>

8 We used an ultraviolet (UV) visible spectrophotometer and a fluorescence spectrophotometer  
9 to record the fluorescence absorption and emission spectra of these mAbs-conjugated QDs  
10 (**Figure S1B**). The major antigen on the outer cell wall of *Salmonella* is lipopolysaccharide (LPS),  
11 which is about 8 - 10 nm thick. With TEM, we found that most mAbs-conjugated QDs bioprobes  
12 attached onto the surface of *Salmonella* (**Figure S1C**).<sup>3</sup> We observed that the nanoparticles  
13 tended to aggregate on the outer cell wall of *Salmonella*.

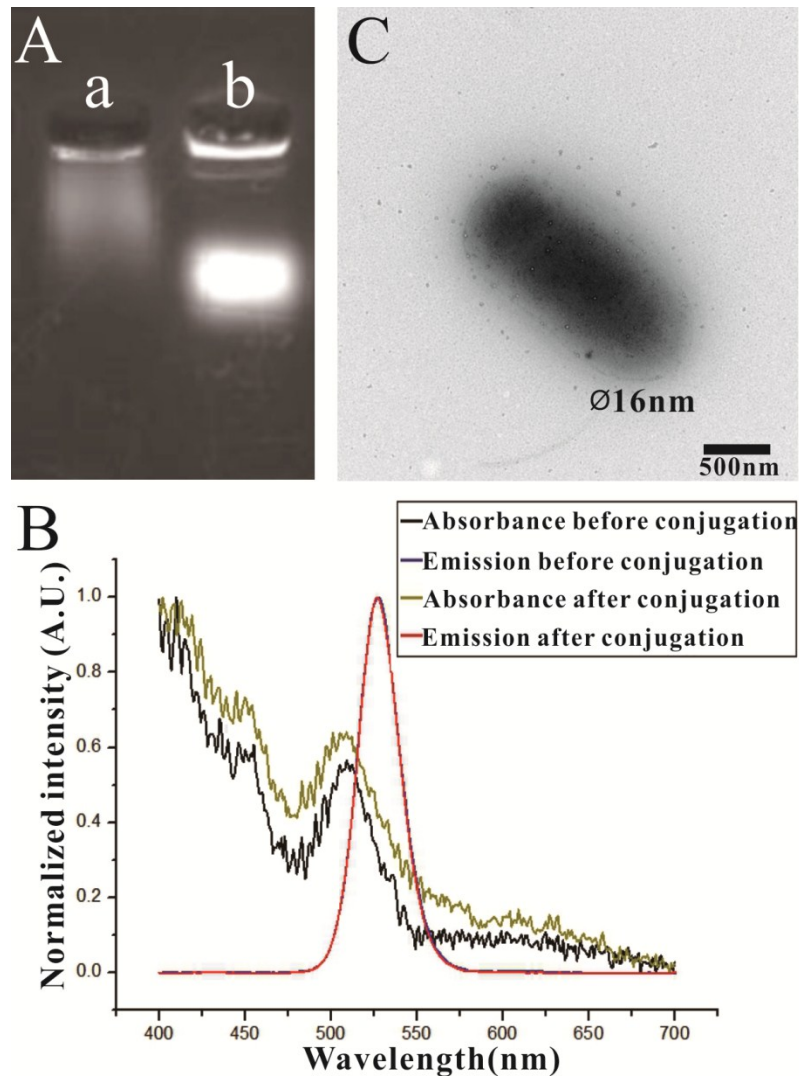

1

2 **Figure S1. Characterization of mAbs-conjugated QDs bioprobes.** (A) Images of gel  
 3 electrophoresis of mAbs-conjugated QDs (lane a) and QDs (lane b). (B) Fluorescence absorption  
 4 and emission spectra of water-soluble QDs before and after the conjugation. **The fluorescence**  
 5 **emission spectras of water-soluble QDs before and after the conjugation are almost entirely**  
 6 **consistent around 526 nm.** (C) TEM micrograph (H-7000FA, magnification of 20.0 k, 75 kV)  
 7 of *Salmonella* incubated with mAbs-conjugated QDs for 15 min. UV scanning wavelength range  
 8 is 400 - 700 nm; scan spacing is 0.5 nm; scan speed is high speed; excitation wavelength is 380  
 9 nm; scan step is 1 nm; reference solution is 10 mM PBS (pH 7.4).

1

2

### 3 **References**

4 1. B. Tang, L. Cao, K. Xu, L. Zhuo, J. Ge, Q. Li, L. Yu, *Chemistry*, 2008, **14**, 3637.

5 2. Clark, R. B., M. A. Lewinski, M. J. Loeffelholz, R. J. Tibbetts. *Cumitech 31A: Verification*  
6 *and Validation of Procedures in the Clinical Microbiology Laboratory*. Coordinating ed., S. E.  
7 Sharp. ASM Press, Washington, DC. 2009.

8 3. R. Schneider, C. Wolpert, H. Guilloteau, L. Balan, J. Lambert, C. Merlin, *Nanotechnology*,  
9 2009, **20**, 225101.

10

11

12 ***Supporting Information Available:*** Description of the material. Refer to Web version on  
13 PubMed Central for supplementary material.

14
